# Supplementary material
Source: MDPI journal article supplement (https://www.mdpi.com/2304-6775/10/3/28)
Supplement: s1 [file s1]

Supplementary

# Malaria Publications before and during COVID-19 Pandemic: A Bibliometric Analysis

Wanida Mala <sup>1</sup>, Polrat Wilairatana <sup>2</sup>, Apichai Wattanapisit <sup>3</sup>, Kwuntida Uthaisar Kotepui <sup>1</sup> and Manas Kotepui <sup>1,\*</sup>

<sup>1</sup> Medical Technology, School of Allied Health Sciences, Walailak University, Tha Sala, Nakhon Si Thammarat 80160, Thailand; wanida.ma@wu.ac.th (W.M.); kwuntida.ut@wu.ac.th (K.U.K.)

<sup>2</sup> Department of Clinical Tropical Medicine, Faculty of Tropical Medicine, Mahidol University, Bangkok 10400, Thailand; polrat.wil@mahidol.ac.th

<sup>3</sup> Department of Clinical Medicine, School of Medicine, Walailak University, Tha Sala, Nakhon Si Thammarat 80160, Thailand; apichai.wa@wu.ac.th

\* Correspondence: manas.ko@wu.ac.th

**Supplementary Table S1.** Top authors that contributed on malaria research publications before and during the COVID-19 pandemic.

| Before the COVID-19 pandemic 2018-2019<br>(n = 679) |                    |      |         |                            | During the COVID-19 pandemic 2020-2021 (n = 612) |                    |      |         |                            |
|-----------------------------------------------------|--------------------|------|---------|----------------------------|--------------------------------------------------|--------------------|------|---------|----------------------------|
| Author                                              | Number of articles | %    | H-index | H-index per total articles | Author                                           | Number of articles | %    | H-index | H-index per total articles |
| Bousema T.                                          | 9                  | 1.33 | 59      | 6.56                       | Dorsey G.                                        | 11                 | 1.80 | 62      | 5.64                       |
| Drakeley C.                                         | 9                  | 1.33 | 77      | 8.56                       | Drakeley C.                                      | 9                  | 1.47 | 77      | 8.56                       |
| Tinto H.                                            | 8                  | 1.18 | 35      | 4.38                       | Staedke S.G.                                     | 9                  | 1.47 | 42      | 4.67                       |
| Bassat Q.                                           | 6                  | 0.88 | 57      | 9.50                       | Tinto H.                                         | 8                  | 1.31 | 35      | 4.38                       |
| Genton B.                                           | 6                  | 0.88 | 55      | 9.17                       | Arinaitwe E.                                     | 7                  | 1.14 | 29      | 4.14                       |
| Plucinski M.M.                                      | 6                  | 0.88 | 21      | 3.50                       | Bousema T.                                       | 7                  | 1.14 | 59      | 8.43                       |
| Rosenthal P.J.                                      | 6                  | 0.88 | 102     | 17.00                      | Kotepui M.                                       | 7                  | 1.14 | 12      | 1.71                       |
| Asante K.P.                                         | 5                  | 0.74 | 32      | 6.40                       | Snow R.W.                                        | 7                  | 1.14 | 101     | 14.43                      |
| Bradley J.                                          | 5                  | 0.74 | 68      | 13.60                      | Kamya M.                                         | 6                  | 0.98 | 61      | 10.17                      |
| Camara A.                                           | 5                  | 0.74 | 60      | 12.00                      | Kamya M.R.                                       | 6                  | 0.98 | 61      | 10.17                      |
| Chandramohan D.                                     | 5                  | 0.74 | 51      | 10.20                      | Kotepui K.U.                                     | 6                  | 0.98 | 9       | 1.50                       |
| De Mast Q.                                          | 5                  | 0.74 | 34      | 6.80                       | Mccarthy J.S.                                    | 6                  | 0.98 | 92      | 15.33                      |
| Dorsey G.                                           | 5                  | 0.74 | 62      | 12.40                      | Nankabirwa J.I.                                  | 6                  | 0.98 | 24      | 4.00                       |

|                                    |   |      |    |       |                                    |   |      |    |      |
|------------------------------------|---|------|----|-------|------------------------------------|---|------|----|------|
| Guilavogui T.                      | 5 | 0.74 | 5  | 1.00  | Tarning J.                         | 6 | 0.98 | 10 | 1.67 |
| Kano S.                            | 5 | 0.74 | 26 | 5.20  | White N.J.                         | 6 | 0.98 | 18 | 3.00 |
| Kariuki S.                         | 5 | 0.74 | 41 | 8.20  | Wilairatana P.                     | 6 | 0.98 | 39 | 6.50 |
| Khan K.                            | 5 | 0.74 | 54 | 10.80 |                                    |   |      |    |      |
| Mayor A.                           | 5 | 0.74 | 34 | 6.80  |                                    |   |      |    |      |
| Thi A.                             | 5 | 0.74 | 9  | 1.80  |                                    |   |      |    |      |
| Average H-index per total articles |   |      |    | 8.10  | Average H-index per total articles |   |      |    | 6.52 |

**Supplementary Table S2.** Top affiliations that contributed on malaria research publications before and during the COVID-19 pandemic.

| Before the COVID-19 pandemic 2018-2019<br>(n = 679)                                                                 |                       |      | During the COVID-19 pandemic 2020-2021 (n = 612)                                                                                                             |                       |      |
|---------------------------------------------------------------------------------------------------------------------|-----------------------|------|--------------------------------------------------------------------------------------------------------------------------------------------------------------|-----------------------|------|
| Affiliations                                                                                                        | Number of<br>articles | %    | Affiliations                                                                                                                                                 | Number of<br>articles | %    |
| University of Basel, Basel, Switzerland                                                                             | 11                    | 1.62 | Infectious Diseases Research Collaboration, Kampala, Uganda                                                                                                  | 12                    | 1.96 |
| Swiss Tropical and Public Health Institute, Basel, Switzerland                                                      | 9                     | 1.33 | Centre for Tropical Medicine and Global Health, Nuffield Department Of Medicine, University of Oxford, Oxford, United Kingdom                                | 9                     | 1.47 |
| Ifakara Health Institute, Dar Es Salaam, Tanzania                                                                   | 6                     | 0.88 | University of Basel, Basel, Switzerland                                                                                                                      | 7                     | 1.14 |
| Infectious Diseases Research Collaboration, Kampala, Uganda                                                         | 6                     | 0.88 | Department of Medical Microbiology, Radboud University Medical Center, Nijmegen, Netherlands                                                                 | 6                     | 0.98 |
| Liverpool School of Tropical Medicine, Liverpool, United Kingdom                                                    | 6                     | 0.88 | Mahidol-Oxford Tropical Medicine Research Unit, Faculty of Tropical Medicine, Mahidol University, Bangkok, Thailand                                          | 6                     | 0.98 |
| Mahidol-Oxford Tropical Medicine Research Unit, Faculty Of Tropical Medicine, Mahidol University, Bangkok, Thailand | 6                     | 0.88 | Malaria Branch, Division of Parasitic Diseases and Malaria, Center for Global Health, Centers for Disease Control and Prevention, Atlanta, Ga, United States | 6                     | 0.98 |
| Medicines For Malaria Venture, Geneva, Switzerland                                                                  | 6                     | 0.88 | Centre For Tropical Medicine and Global Health, Nuffield Department of Clinical Medicine, University of Oxford, Oxford, United Kingdom                       | 5                     | 0.82 |

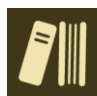

|                                                                                                                                        |   |      |                                                                        |   |      |
|----------------------------------------------------------------------------------------------------------------------------------------|---|------|------------------------------------------------------------------------|---|------|
| Centre For Tropical Medicine and Global Health, Nuffield Department Of Medicine, University of Oxford, Oxford, United Kingdom          | 5 | 0.74 | London School of Hygiene and Tropical Medicine, London, United Kingdom | 5 | 0.82 |
| Malaria Consortium, London, United Kingdom                                                                                             | 5 | 0.74 | Medicines for Malaria Venture, Geneva, Switzerland                     | 5 | 0.82 |
| Centre For Tropical Medicine and Global Health, Nuffield Department of Clinical Medicine, University of Oxford, Oxford, United Kingdom | 4 | 0.59 | Swiss Tropical and Public Health Institute, Basel, Switzerland         | 5 | 0.82 |
| Department Of Agriculture, Food and Environment, University Of Pisa, Via Del Borghetto 80, Pisa, 56124, Italy                          | 4 | 0.59 |                                                                        |   |      |
| Department Of Zoology and Animal Physiology, University of Buea, Buea, Cameroon                                                        | 4 | 0.59 |                                                                        |   |      |
| Faculty Of Infectious and Tropical Diseases, London School of Hygiene and Tropical Medicine, London, United Kingdom                    | 4 | 0.59 |                                                                        |   |      |
| Icrea, Pg. Lluís Companys 23, Barcelona, 08010, Spain                                                                                  | 4 | 0.59 |                                                                        |   |      |
| London School of Hygiene and Tropical Medicine, London, United Kingdom                                                                 | 4 | 0.59 |                                                                        |   |      |
| Malaria Branch, Division of Parasitic Diseases and Malaria, Centers for Disease Control and Prevention, Atlanta, Ga, United States     | 4 | 0.59 |                                                                        |   |      |
| Mrc Tropical Epidemiology Group, London School of Hygiene and Tropical Medicine, London, United Kingdom                                | 4 | 0.59 |                                                                        |   |      |
| National Institute of Health, Ministry of Health, Maputo, Mozambique                                                                   | 4 | 0.59 |                                                                        |   |      |

**Supplementary Table S3.** Top countries that contributed on malaria research publications before and during the COVID-19 pandemic.

| <b>Before the COVID-19 pandemic 2018-2019 (n = 679)</b> |                           |                             |                                                |                                                          |                                                                    |                                                                                 |                                                            |                                                         |
|---------------------------------------------------------|---------------------------|-----------------------------|------------------------------------------------|----------------------------------------------------------|--------------------------------------------------------------------|---------------------------------------------------------------------------------|------------------------------------------------------------|---------------------------------------------------------|
| <b>Country</b>                                          | <b>Number of articles</b> | <b>% (per 679 articles)</b> | <b>Population (million) per total articles</b> | <b>GDP (Billions of U.S. dollars) per total articles</b> | <b>GDP per capita (U.S. dollars per capita) per total articles</b> | <b>Research and development expenditure (percent of GDP) per total articles</b> | <b>Researchers (per million people) per total articles</b> | <b>Physicians (per 1,000 people) per total articles</b> |
| United States                                           | 182                       | 26.80                       | 1.83                                           | 139.29                                                   | 417.75                                                             | 0.02                                                                            | 26.49                                                      | 0.01                                                    |
| United Kingdom                                          | 117                       | 17.23                       | 0.58                                           | 28.89                                                    | 425.30                                                             | 0.01                                                                            | 40.03                                                      | 0.05                                                    |
| India                                                   | 70                        | 10.31                       | 20.07                                          | 50.43                                                    | 36.00                                                              | 0.01                                                                            | 3.61                                                       | 0.01                                                    |
| Switzerland                                             | 53                        | 7.81                        | 0.16                                           | 15.89                                                    | 1818.68                                                            | 0.06                                                                            | 104.75                                                     | 0.08                                                    |
| Nigeria                                                 | 46                        | 6.77                        | 4.71                                           | 11.10                                                    | 51.30                                                              | 0.00                                                                            | 0.85                                                       | 0.01                                                    |
| France                                                  | 38                        | 5.60                        | 1.73                                           | 77.37                                                    | 1177.63                                                            | 0.06                                                                            | 129.63                                                     | 0.17                                                    |
| Netherlands                                             | 36                        | 5.30                        | 0.49                                           | 28.06                                                    | 1606.67                                                            | 0.06                                                                            | 164.22                                                     | 0.10                                                    |
| Spain                                                   | 35                        | 5.15                        | 1.36                                           | 41.14                                                    | 861.71                                                             | 0.04                                                                            | 88.83                                                      | 0.11                                                    |
| Australia                                               | 32                        | 4.71                        | 0.81                                           | 54.69                                                    | 2108.13                                                            | 0.06                                                                            | 141.63                                                     | 0.12                                                    |
| Kenya                                                   | 32                        | 4.71                        | 1.59                                           | 3.58                                                     | 70.31                                                              | 0.02                                                                            | 6.91                                                       | 0.01                                                    |
| <b>During the COVID-19 pandemic 2020-2021 (n = 612)</b> |                           |                             |                                                |                                                          |                                                                    |                                                                                 |                                                            |                                                         |
| United States                                           | 165                       | 26.96                       | 2.02                                           | 153.64                                                   | 460.79                                                             | 0.02                                                                            | 29.22                                                      | 0.02                                                    |
| United Kingdom                                          | 117                       | 19.12                       | 0.58                                           | 28.89                                                    | 425.30                                                             | 0.01                                                                            | 40.03                                                      | 0.05                                                    |
| India                                                   | 70                        | 11.44                       | 20.07                                          | 50.43                                                    | 36.00                                                              | 0.01                                                                            | 3.61                                                       | 0.01                                                    |
| France                                                  | 37                        | 6.05                        | 1.77                                           | 79.46                                                    | 1209.46                                                            | 0.06                                                                            | 133.14                                                     | 0.18                                                    |
| Germany                                                 | 37                        | 6.05                        | 2.25                                           | 115.14                                                   | 1381.08                                                            | 0.08                                                                            | 118.73                                                     | 0.12                                                    |
| Kenya                                                   | 35                        | 5.72                        | 1.45                                           | 3.28                                                     | 64.29                                                              | 0.02                                                                            | 6.31                                                       | 0.01                                                    |
| Uganda                                                  | 34                        | 5.56                        | 1.29                                           | 13.64                                                    | 31.18                                                              | 0.00                                                                            | 0.82                                                       | 0.01                                                    |
| Australia                                               | 32                        | 5.23                        | 0.81                                           | 54.69                                                    | 2108.13                                                            | 0.06                                                                            | 141.63                                                     | 0.12                                                    |
| Thailand                                                | 31                        | 5.07                        | 2.26                                           | 16.84                                                    | 240.32                                                             | 0.04                                                                            | 57.74                                                      | 0.03                                                    |
| Nigeria                                                 | 30                        | 4.90                        | 7.22                                           | 17.02                                                    | 78.67                                                              | 0.00                                                                            | 1.30                                                       | 0.01                                                    |
| Switzerland                                             | 30                        | 4.90                        | 0.29                                           | 28.07                                                    | 3213.00                                                            | 0.11                                                                            | 185.07                                                     | 0.14                                                    |

**Supplementary Table S4.** Top journals that contributed on malaria research publications before and during the COVID-19 pandemic.

| Journal                                                           | Frequency  | %           | Cite Score   |              |
|-------------------------------------------------------------------|------------|-------------|--------------|--------------|
| <b>Before the COVID-19 pandemic 2018-2019 (n = 679)</b>           |            |             | 2018         | 2019         |
| Malaria Journal                                                   | 93         | 13.7        | 4.9          | 5.0          |
| American Journal of Tropical Medicine and Hygiene                 | 41         | 6.0         | 4.2          | 4.0          |
| Plos One                                                          | 27         | 4.0         | 5.4          | 5.2          |
| Clinical Infectious Diseases                                      | 12         | 1.8         | 13.8         | 12.5         |
| Plos Neglected Tropical Diseases                                  | 11         | 1.6         | 7.4          | 7.6          |
| BMC Infectious Diseases                                           | 10         | 1.5         | 4.3          | 4.1          |
| Infectious Diseases of Poverty                                    | 8          | 1.2         | 4.1          | 5.5          |
| Travel Medicine and Infectious Disease                            | 8          | 1.2         | 4.1          | 4.7          |
| BMC Research Notes                                                | 7          | 1.0         | 2.1          | 2.1          |
| International Journal of Environmental Research and Public Health | 7          | 1.0         | 3.1          | 3.0          |
| Journal of Travel Medicine                                        | 7          | 1.0         | 2.9          | 5.5          |
| PLoS Medicine                                                     | 7          | 1.0         | 15.5         | 15.5         |
| Emerging Infectious Diseases                                      | 6          | 0.9         | 9.8          | 8.8          |
| BMC Public Health                                                 | 5          | 0.7         | 4.3          | 3.9          |
| Chinese Journal of Schistosomiasis Control                        | 5          | 0.7         | 0.3          | 0.2          |
| Cochrane Database of Systematic Reviews                           | 5          | 0.7         | 8.0          | 7.4          |
| Journal of Association of Physicians of India                     | 5          | 0.7         | 0.6          | 0.7          |
| The Lancet Infectious Diseases                                    | 5          | 0.7         | 31.9         | 32.4         |
| Tropical Medicine and Health                                      | 5          | 0.7         | 4.7          | 4.5          |
| <b>Total</b>                                                      | <b>274</b> | <b>40.1</b> | <b>131.4</b> | <b>132.6</b> |
| <b>Average CiteScore</b>                                          |            |             | <b>6.91</b>  | <b>6.97</b>  |
| <b>Average CiteScore 2018-2019</b>                                |            |             | <b>6.95</b>  |              |
| <b>During the COVID-19 pandemic 2020-2021 (n = 612)</b>           |            |             |              |              |
| Malaria Journal                                                   | 89         | 14.5        | 5.1          | 5.2          |
| American Journal of Tropical Medicine and Hygiene                 | 30         | 4.9         | 4.0          | 4.4          |
| Plos One                                                          | 17         | 2.8         | 5.3          | 5.6          |
| PLoS Medicine                                                     | 9          | 1.5         | 13.9         | 15.0         |
| Pathogens                                                         | 8          | 1.3         | 2.5          | 3.5          |
| PLoS Neglected Tropical Diseases                                  | 8          | 1.3         | 7.1          | 6.8          |
| Scientific Reports                                                | 8          | 1.3         | 7.1          | 6.9          |
| BMC Public Health                                                 | 7          | 1.1         | 4.1          | 4.9          |
| Clinical Infectious Diseases                                      | 7          | 1.1         | 13.2         | 17.3         |
| International Journal of Infectious Diseases                      | 7          | 1.1         | 7.0          | 10.8         |
| Journal of Ethnopharmacology                                      | 7          | 1.1         | 6.0          | 6.9          |
| Journal of Travel Medicine                                        | 7          | 1.1         | 13.0         | 15.2         |
| Tropical Doctor                                                   | 7          | 1.1         | 1.1          | 1.0          |
| BMC Infectious Diseases                                           | 6          | 1.0         | 4.4          | 4.8          |
| BMC Medicine                                                      | 6          | 1.0         | 10.3         | 12.8         |
| Frontiers in Immunology                                           | 6          | 1.0         | 8.1          | 9.8          |
| Infectious Diseases of Poverty                                    | 6          | 1.0         | 7.2          | 10.8         |
| The Lancet Infectious Diseases                                    | 6          | 1.0         | 36.6         | 50.3         |
| Travel Medicine and Infectious Disease                            | 6          | 1.0         | 8.6          | 14.8         |
| Tropical Medicine and Infectious Disease                          | 6          | 1.0         | 3.6          | 4.8          |
| China Tropical Medicine                                           | 5          | 0.8         | N/A          | 0.1          |
| Emerging Infectious Diseases                                      | 5          | 0.8         | 9.8          | 13.0         |
| Tropical Parasitology                                             | 5          | 0.8         | 2.1          | 2.1          |

|                                                                    |            |             |             |              |
|--------------------------------------------------------------------|------------|-------------|-------------|--------------|
| Vaccine                                                            | 5          | 0.8         | 5.6         | 6.7          |
| BMJ Global Health                                                  | 4          | 0.7         | 5.5         | 7.2          |
| Cochrane Database of Systematic Reviews                            | 4          | 0.7         | 7.1         | 7.6          |
| Frontiers in Cellular and Infection Microbiology                   | 4          | 0.7         | 6.5         | 5.9          |
| Infection and Drug Resistance                                      | 4          | 0.7         | 3.9         | 5.6          |
| International Journal of Environmental Research and Public Health  | 4          | 0.7         | 3.4         | 4.5          |
| The Lancet                                                         | 4          | 0.7         | 91.5        | 115.3        |
| African Journal of Laboratory Medicine                             | 3          | 0.5         | 1.4         | 1.8          |
| Antimicrobial Agents and Chemotherapy                              | 3          | 0.5         | 9.1         | 9.3          |
| BMC Research Notes                                                 | 3          | 0.5         | 2.6         | 3.5          |
| Diagnostics                                                        | 3          | 0.5         | 1.4         | 2.4          |
| eLife                                                              | 3          | 0.5         | 10.6        | 11.6         |
| Frontiers in Microbiology                                          | 3          | 0.5         | 7.3         | 8.2          |
| Frontiers in Pharmacology                                          | 3          | 0.5         | 6.5         | 5.9          |
| JCI Insight                                                        | 3          | 0.5         | 9.9         | 13.4         |
| Journal of Communicable Diseases                                   | 3          | 0.5         | 0.3         | 0.2          |
| Journal of Tropical Medicine                                       | 3          | 0.5         | 2.7         | 3.3          |
| Nature Communications                                              | 3          | 0.5         | 20.0        | 23.2         |
| Pakistan Paediatric Journal                                        | 3          | 0.5         | 0.1         | 0.1          |
| Pan African Medical Journal                                        | 3          | 0.5         | 0.8         | 1.0          |
| Parasites and Vectors                                              | 3          | 0.5         | 5.7         | 6.4          |
| PLoS Pathogens                                                     | 3          | 0.5         | 11.0        | 10.5         |
| Science                                                            | 3          | 0.5         | 46.8        | 57.8         |
| Southeast Asian Journal of Tropical Medicine and Public Health     | 3          | 0.5         | 0.8         | 0.5          |
| The Lancet Global Health                                           | 3          | 0.5         | 32.1        | 41.8         |
| Transactions of the Royal Society of Tropical Medicine and Hygiene | 3          | 0.5         | 2.5         | 2.9          |
| Tropical Medicine and Health                                       | 3          | 0.5         | 4.3         | 4.2          |
| Vector-Borne and Zoonotic Diseases                                 | 3          | 0.5         | 3.8         | 4.0          |
| <b>Total</b>                                                       | <b>300</b> | <b>49.1</b> | <b>305</b>  | <b>381.4</b> |
| <b>Average CiteScore</b>                                           |            |             | <b>9.84</b> | <b>12.3</b>  |
| <b>Average CiteScore 2018-2019</b>                                 |            |             |             | <b>11.1</b>  |

**Supplementary Table S5.** Top keywords that contributed on malaria research publications before and during the COVID-19 pandemic.

| Before COVID-19 pandemic 2018-2019<br>(n = 679) |             |       | During the COVID-19 pandemic 2020-2021 (n = 612) |             |       |
|-------------------------------------------------|-------------|-------|--------------------------------------------------|-------------|-------|
| Keywords                                        | Occurrences | %     | Keywords                                         | Occurrences | %     |
| Human                                           | 562         | 82.77 | Human                                            | 522         | 85.29 |
| Malaria                                         | 511         | 75.26 | Malaria                                          | 471         | 76.96 |
| Humans                                          | 462         | 68.04 | Fever                                            | 410         | 66.99 |
| Article                                         | 426         | 62.74 | Article                                          | 407         | 66.50 |
| Fever                                           | 408         | 60.09 | Humans                                           | 392         | 64.05 |

|                      |     |       |                       |     |       |
|----------------------|-----|-------|-----------------------|-----|-------|
| Male                 | 400 | 58.91 | Male                  | 322 | 52.61 |
| Female               | 351 | 51.69 | Female                | 317 | 51.80 |
| Adult                | 315 | 46.39 | Plasmodium falciparum | 283 | 46.24 |
| Child                | 234 | 34.46 | Adult                 | 282 | 46.08 |
| Major clinical study | 218 | 32.11 | Malaria falciparum    | 240 | 39.22 |

**Supplementary Table S6.** Top funding sources for malaria research publications before and during the COVID-19 pandemic.

| Funding sponsor                                                    | Frequency | %    |
|--------------------------------------------------------------------|-----------|------|
| <b>Before COVID-19 pandemic 2018-2019 (n = 679)</b>                |           |      |
| No funding sponsor                                                 | 369       | 54.3 |
| Having funding sponsors                                            | 310       | 45.7 |
| <b>Top funding sponsors</b>                                        |           |      |
| National Institutes of Health (NIH), USA                           | 74        | 10.9 |
| National Institute of Allergy and Infectious Diseases (NIAID), USA | 43        | 6.3  |
| Bill and Melinda Gates Foundation (BMGF), USA                      | 34        | 5.0  |
| Wellcome Trust (WT), UK                                            | 29        | 4.3  |
| Medical Research Council (MRC), UK                                 | 28        | 4.1  |
| Department for International Development (DFID), UK                | 22        | 3.2  |
| United States Agency for International Development (USAID), USA    | 16        | 2.4  |
| World Health Organization (WHO), USA                               | 16        | 2.4  |
| Fogarty International Center (FIC), USA                            | 13        | 1.9  |
| Global Fund to Fight AIDS, Tuberculosis and Malaria, Switzerland   | 11        | 1.6  |
| Centers for Disease Control and Prevention (CDC), USA              | 8         | 1.2  |
| <b>During the COVID-19 pandemic 2020-2021 (n = 612)</b>            |           |      |
| No funding sponsor                                                 | 305       | 49.8 |
| Having funding sponsors                                            | 307       | 50.2 |
| <b>Top funding sponsors</b>                                        |           |      |
| National Institutes of Health (NIH), USA                           | 51        | 8.3  |
| National Institute of Allergy and Infectious Diseases (NIAID), USA | 45        | 7.4  |
| Bill and Melinda Gates Foundation (BMGF), USA                      | 38        | 6.2  |
| Wellcome Trust (WT), UK                                            | 26        | 4.2  |

|                                                                        |    |     |
|------------------------------------------------------------------------|----|-----|
| Medical Research Council (MRC), UK                                     | 21 | 3.4 |
| Fogarty International Center (FIC), USA                                | 12 | 2.0 |
| United States Agency for International Development (USAID), USA        | 10 | 1.6 |
| Government of the United Kingdom, UK                                   | 10 | 1.6 |
| Department for International Development (DFID), UK                    | 9  | 1.5 |
| National Natural Science Foundation of China, China                    | 8  | 1.3 |
| Department of Biotechnology, Ministry of Science and Technology, India | 7  | 1.1 |
| Agence Nationale de la Recherche (ANR), France                         | 7  | 1.1 |

**Supplementary Table S7.** Top languages for malaria research publications before and during the COVID-19 pandemic.

| Before COVID-19 pandemic: 2018-2019 (n = 679) |           |      | During the COVID-19 pandemic 2020-2021 (n = 612) |           |      |
|-----------------------------------------------|-----------|------|--------------------------------------------------|-----------|------|
| Language                                      | Frequency | %    | Language                                         | Frequency | %    |
| English                                       | 642       | 94.6 | English                                          | 586       | 95.8 |
| French                                        | 7         | 1.0  | Chinese                                          | 7         | 1.1  |
| Spanish                                       | 7         | 1.0  | French                                           | 3         | 0.5  |
| Chinese                                       | 5         | 0.7  | Spanish                                          | 2         | 0.3  |
| Czech                                         | 2         | 0.3  | Dutch                                            | 1         | 0.2  |
| Turkish                                       | 2         | 0.3  | German                                           | 1         | 0.2  |
| German                                        | 2         | 0.3  | Russian                                          | 1         | 0.2  |
| Japanese                                      | 1         | 0.1  | Japanese                                         | 1         | 0.2  |
| Swedish                                       | 1         | 0.1  | Turkish                                          | 1         | 0.2  |
| Portuguese                                    | 1         | 0.1  |                                                  |           |      |



**Supplementary Table S8.** Publication types of malaria research publications before and during the COVID-19 pandemic.

| Before COVID-19 pandemic 2018-2019 (n = 679) |           |      | After COVID-19 pandemic.2020-2021 (n = 612) |           |      |
|----------------------------------------------|-----------|------|---------------------------------------------|-----------|------|
| Publication types                            | Frequency | %    | Publication types                           | Frequency | %    |
| Article                                      | 640       | 94.3 | Article                                     | 575       | 94.0 |
| Review                                       | 17        | 2.5  | Review                                      | 22        | 3.6  |
| Book Chapter                                 | 14        | 2.1  | Note                                        | 5         | 0.8  |
| Letter                                       | 3         | 0.4  | Letter                                      | 4         | 0.7  |
| Note                                         | 2         | 0.3  | Book Chapter                                | 3         | 0.5  |
| Conference paper                             | 2         | 0.3  |                                             |           |      |

**Supplementary Table S9.** Subject areas of malaria research publications before and during the COVID-19 pandemic.

| Before COVID-19 pandemic 2018-2019 (n = 679) |           |      | After COVID-19 pandemic.2020-2021 (n = 612)  |           |      |
|----------------------------------------------|-----------|------|----------------------------------------------|-----------|------|
| Subject area                                 | Frequency | %    | Subject area                                 | Frequency | %    |
| Medicine                                     | 223       | 32.8 | Medicine                                     | 199       | 32.5 |
| Immunology and Microbiology                  | 47        | 6.9  | Immunology and Microbiology                  | 54        | 8.8  |
| Biochemistry, Genetics and Molecular Biology | 36        | 5.3  | Biochemistry, Genetics and Molecular Biology | 44        | 7.2  |
| Pharmacology, Toxicology and Pharmaceutics   | 28        | 4.1  | Pharmacology, Toxicology and Pharmaceutics   | 18        | 2.9  |
| Agricultural and Biological Sciences         | 13        | 1.9  | Agricultural and Biological Sciences         | 15        | 2.5  |
